# Supplementary material
Source: Springer Nature journal article supplement (https://www.springermedizin.de/resource/supplementary/13046_2011_467_MOESM4_ESM.pdf/9662312)

1

2

3

STAT3

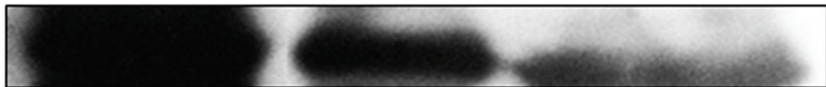

92 kDa

pSTAT3

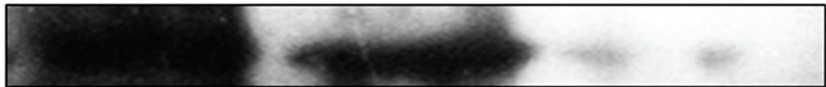

92 kDa

 $\beta$ -actin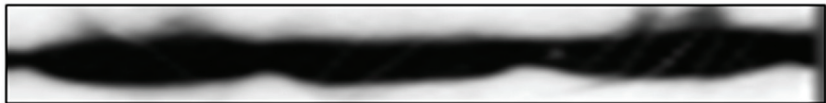

42 kDa

Supplement: MOESM4 [file 9662312]
